# Supplementary material for: Bis(imino)pyridine cobalt alkyl complexes and their reactivity towards ethylene: a model system for β-hydrogen chain transfer
Source: Royal Society of Chemistry journal article supplement (doi:10.1039/b207794a), 2002-01-01
Supplement: b207794a.doc [file b207794a.doc]

**Supplementary data**

**Bis(imino)pyridine cobalt alkyl complexes and their reactivity towards ethylene: a model system for -hydrogen chain transfer.**

Vernon C. Gibson, Kilian P. Tellmann, Martin J. Humphries and Duncan F. Wass

### Content

Experimental details for compounds **2-4**

Kinetic analysis

Sample NMR spectra

–––––––––––––––––––––––––––––––––––––––––

*General:*

*Spectroscopic Data*. All spectra were recorded at ambient temperature unless otherwise stated. 1H and 13C NMR spectra were recorded on a Bruker AC-250 at 250.133 MHz and 62.896 MHz, respectively). On the occasions that higher field instruments were employed, spectra were recorded on either a Bruker DRX-400 (1H and 13C spectra at 400.129 MHz and 100.613 MHz, respectively) or a Bruker AM-500 (1H resonance at 500.133MHz). All spectra were referenced internally to residual protio solvent resonances.

### Preparation of [CoCl2{N3(dipp)2}] 1.

This compound was prepared by a published procedure (reference 3*c*, G. J. P. Britovsek et al., *J. Am. Chem. Soc*., 1999, **121**, 8728).

### Preparation of [Co(CH2CH3){N3(dipp)2}] 2.

[CoCl2{N3(dipp)2}] **1** (306 mg, 0.500 mmol) was treated with ethylmagnesium chloride (0.50 cm3 of a 3.0 M solution in Et2O, 1.50 mmol) in diethyl ether (20 cm3) at –78°C, and allowed to warm to 0°C over 24 hours. The volatiles were then removed under reduced pressure. Extraction with toluene (18cm3), followed by filtration and solvent removal under reduced pressure, afforded a dark purple solid that was dried *in vacuo* at 30°C for 30 minutes. Yield 150mg, 53% based on [CoCl2{N3(dipp)2}].

1H-NMR (C6D6): 10.25ppm (1H, t; *p*-H, py), 7.99ppm (2H, t; *m*-H, py), 7.51ppm (2H, distorted triplet; *p*-H, Ar), 7.39ppm (4H, distorted doublet; *m*-H, Ar), 5.24ppm (0.16H, s; C2H4), 3.14ppm (4H, septet; (CH3)CH(CH3)), 1.51ppm (2H, q; CoCH2CH3), 1.17ppm (12H, d;(CH3)CH(CH3)), 0.74ppm (12H, d;(CH3)CH(CH3)), –1.18ppm (3H, t; CoCH2CH3), –1.33ppm (6H, s; ArN=CCH3).

13C-NMR (C6D6, 100MHz): 165.2ppm (ArN=CCH3), 157.8ppm (*o*-C, py), 154.9ppm (*i*-C, Ar), 140.8ppm (*o*-C, Ar), 126.6ppm (*p*-C, Ar), 124.1ppm (*m*-C, Ar), 122.6ppm (*m*-C, py), 117.6ppm (*p*-C, py), 28.5ppm ((CH3)CH(CH3)), 26.4ppm (ArN=CCH3), 24.3ppm ((CH3)CH(CH3)), 23.3ppm ((CH3)CH(CH3)), 13.0ppm (CoCH2CH3), –10.5ppm (CoCH2CH3).

### Preparation of [Co(CH2CH2CH3){N3(dipp)2}] 3.

**3** was prepared by a similar procedure to that described for compound **2**. 0.500 mmol of [CoCl2{N3(dipp)2}] (306 mg) and 1.50 mmol of *n*-propylmagnesium chloride (0.75 cm3 of a 2.0 M solution in Et2O) in diethyl ether (20 cm3), afforded the title compound in good purity after extraction with pentane (30cm3). Typical yields are 120-150mg, 41-51% based on [CoCl2{N3(dipp)2}].

1H-NMR (C6D6): 10.25ppm (1H, t; *p*-H, py), 7.98ppm (2H, t; *m*-H, py), 7.52ppm (2H, distorted triplet; *p*-H, Ar), 7.40ppm (4H, distorted doublet; *m*-H, Ar), 3.12ppm (4H, septet; (CH3)CH(CH3)), 1.31ppm (2H, m; CoCH2CH2CH3; *1J* = 119Hz), 1.17ppm (12H, d;(CH3)CH(CH3)), 0.78ppm (12H, d;(CH3)CH(CH3)), 0.50ppm (3H, t; CoCH2CH2CH3; *1J* = 123Hz), –0.73ppm (2H, m; CoCH2CH2CH3; *1J* = 125Hz), –1.31ppm (6H, s; ArN=CCH3).

13C-NMR (C6D6, 100MHz): 165.3ppm (ArN=CCH3), 157.7ppm (*o*-C, py), 155.1ppm (*i*-C, Ar), 140.8ppm (*o*-C, Ar), 126.5ppm (*p*-C, Ar), 124.0ppm (*m*-C, Ar), 122.6ppm (*m*-C, py), 117.6ppm (*p*-C, py), 28.5ppm ((CH3)CH(CH3)), 26.4ppm (ArN=CCH3), 24.4ppm ((CH3)CH(CH3)), 23.4ppm ((CH3)CH(CH3)), 21.8ppm (CoCH2CH2CH3), 16.2ppm (CoCH2CH2CH3), 1.5ppm (CoCH2CH2CH3).

E.I.-MS (m/z): 539 [{N3(dipp)2}Co], 82%; 466, 46%; 308, 78%; 90, 100%.

### Preparation of [Co(CH2CH2CH2CH3){N3(dipp)2}] 4.

**4** was prepared by a similar procedure to that described for compound **2**. Using 0.500 mmol of [CoCl2{N3(dipp)2}] (306 mg) and 1.50 mmol of *n*-butylmagnesium chloride (0.75 cm3 of a 2.0 M solution in Et2O), the title compound was obtained in yields of 120-150mg, 40-50% based on [CoCl2{N3(dipp)2}].

1H-NMR (C6D6): 10.24ppm (1H, t; *p*-H, py), 7.99ppm (2H, t; *m*-H, py), 7.52ppm (2H, distorted triplet; *p*-H, Ar), 7.40ppm (4H, distorted doublet; *m*-H, Ar), 3.11ppm (4H, septet; (CH3)CH(CH3)), 1.28ppm (2H, m; CoCH2CH2CH2CH3), 1.17ppm (12H, d;(CH3)CH(CH3)), 0.87ppm (~2H, distorted triplet; CoCH2CH2CH2CH3), 0.79ppm (12H, d;(CH3)CH(CH3)), 0.61ppm (3H, t; CoCH2CH2CH2CH3), –0.85ppm (2H, m; CoCH2CH2CH2CH3), –1.31ppm (6H, s; ArN=CCH3).

13C-NMR (C6D6, 100MHz): 165.2ppm (ArN=CCH3), 157.7ppm (*o*-C, py), 155.0ppm (*i*-C, Ar), 140.9ppm (*o*-C, Ar), 126.4ppm (*p*-C, Ar), 124.0ppm (*m*-C, Ar), 122.6ppm (*m*-C, py), 117.6ppm (*p*-C, py), 30.5ppm (CoCH2CH2CH2CH3), 28.5ppm ((CH3)CH(CH3)), 26.4ppm (ArN=CCH3), 24.5ppm ((CH3)CH(CH3)), 23.4ppm ((CH3)CH(CH3)), 14.2ppm (CoCH2CH2CH2CH3), 13.7ppm (CoCH2CH2CH2CH3), –2.2ppm (CoCH2CH2CH2CH3).

The *d9*-analogue of **4**, [Co(CD2CD2CD2CD3){N3(dipp)2}] was prepared by an identical procedure using *d9*-*n*-butyl magnesium bromide in diethylether.

### General procedure for the preparation of NMR samples for alkyl exchange reactions

A typical NMR sample contained 0.030 mmol of the cobalt(I) species in 0.60 cm3-0.70 cm3 of *d6*-benzene or *d8*-toluene. The solutions were degassed by two freeze-pump-thaw cycles prior to condensation of the appropriate amount of ethylene (or propylene) at 77K. The samples were defrosted when required and inserted into an NMR machine with its probe set to the desired reaction temperature.

### *In-situ* treatment of [CoMe{N3(dipp)2}] with dihydrogen

A solution of [CoMe{N3(dipp)2}] (11.2 mg, 0.020 mmol) in *d6*-benzene (0.6 cm3) was degassed twice (freeze-pump-thaw). Approximately one equivalent of dihydrogen gas was admitted into the vacuum above a frozen solution at 77K. The solution was allowed to thaw and mixed with the gas by shaking.

1H-NMR (C6D6): 10.81ppm (1H, t; *p*-H, py), 7.64ppm–7.57ppm (4H, m; superposition of *m*-H, py and *p*-H, Ar), 7.46ppm (4H, distorted doublet; *m*-H, Ar), 3.42ppm (4H, septet; (CH3)CH(CH3)), 1.31ppm (12H, d; (CH3)CH(CH3)), 0.29ppm (12H, d;(CH3)CH(CH3)), –1.66ppm (6H, s; ArN=CCH3). A resonance for Co–H is not observed.

### Kinetic analysis

In a typical kinetic run, the reaction progress was followed by 1H-NMR spectroscopy in which at least 20 data points were collected, where possible, over more than 2.5 half-lives.

The peak area of the resonances from the methyl groups at the end of the metal-bonded alkyl chain was chosen for the kinetic analysis. Any other chemical shift environments indicative of reaction progress (e.g. olefinic signals, -methylene unit in alkyl chain) were also integrated for cross-reference. For the kinetic analysis, the disappearance of the starting organocobalt complex was plotted against time. Linear least-squares fits through ln[complex] gave a line with slope –k (where k = the rate constant for the reaction). All linear fits were of high quality, with R2 always greater than 0.996.

*Eyring plot.* The Eyring plot comprises eight data points. Three of these were recorded at the same temperature (300K), their average value being shown in the graph. The other five data points represent the rate constants as determined at 315K, 310K, 305K, 294K and 283K. The error bars shown in the Eyring plot are estimated quantities (±0.67% in X and ±0.30% in Y).

1H-NMR spectrum of **4** in *d6*-benzene

**4**

LCoCH2C***H****2*Et

LCo(CH2)2C***H****2*CH3

LCo(CH2)3C***H***3

LCoC***H****2*(CH2)2CH3

*

1HNMR spectrum of the products (**2** + C4H8) arising from the reaction of **4** with C2H4 (*d6*-benzene, 300 K, 1205 min)

excess C2***H***4

EtC***H***=CH2

EtCH=C***H***2

CH3C***H***2CH=CH2

C***H***3CH2CH=CH2

LCoC***H****2*CH3

LCoCH2C***H****3*

*

**2**

**+**

t = 0

t = +60min

t = +108min

t = +228min

t = +20h05min

1 H NMR spectra showing the reaction of **4** with ethylene over time (at 300 K)

LCoCH2CH2CH*2*C***H***3 (**4**)

LCoCH2C***H***2Et(**4**)

LCoCH2C***H***3 (**2**)

+1.0

+0.5

-0.5

-1.0

-1.5

0

 / ppm

LCoCH2C***H***3 (**2**)
